# Supplementary material for: Synthesis and biodistribution of novel 99mTcN complexes of glucose dithiocarbamate as potential probes for tumor imaging
Source: Royal Society of Chemistry journal article supplement (doi:10.1039/c6md00127k), 2016-01-01
Supplement: c6md00127k1.pdf [file c6md00127k1.pdf]

# Electronic Supplementary Information

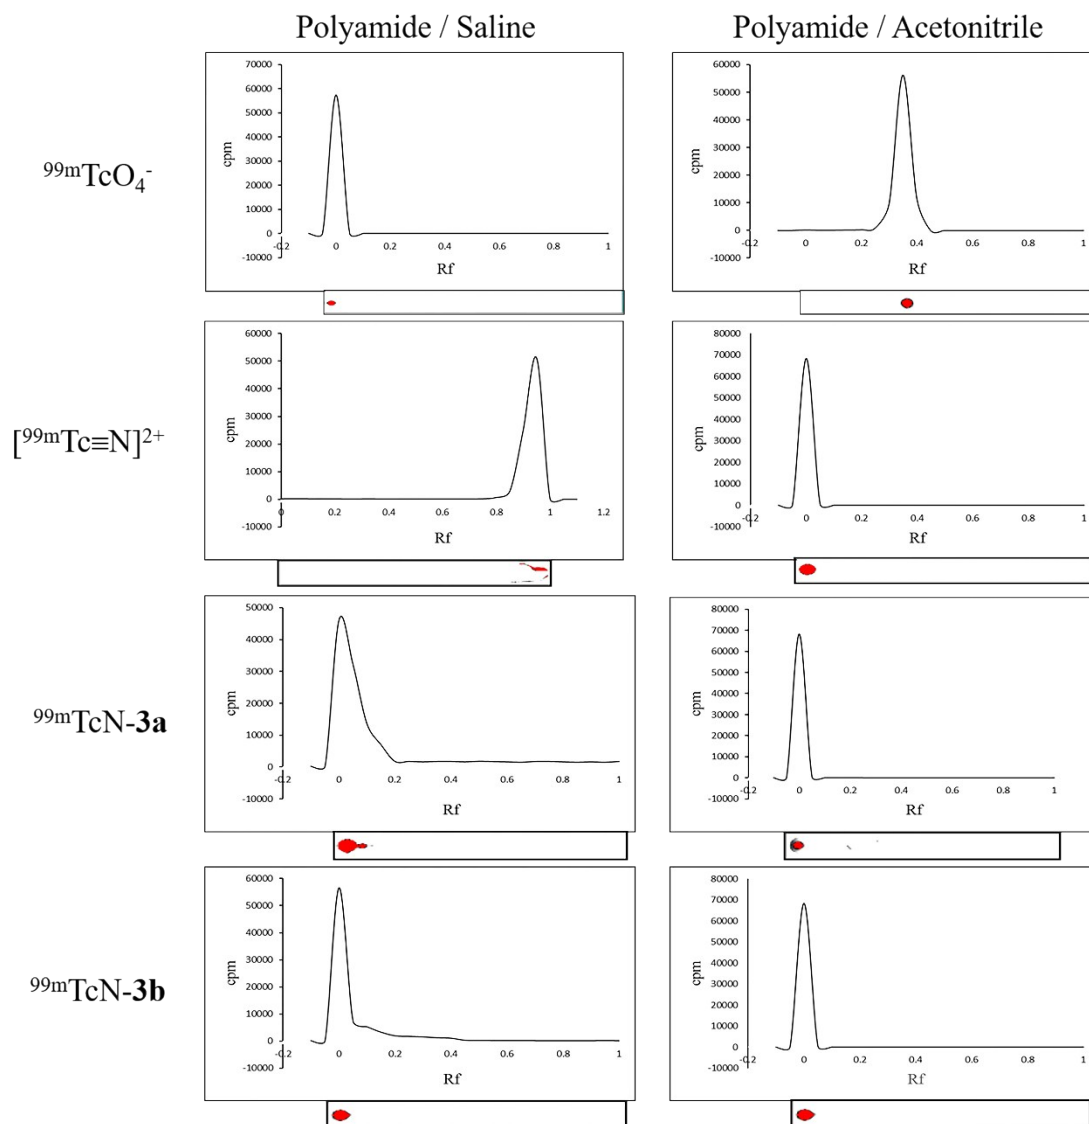

The TLC results of  $^{99m}\text{TcO}_4^-$ ,  $[\text{}^{99m}\text{Tc}\equiv\text{N}]_{\text{int}}^{2+}$ ,  $^{99m}\text{TcN-3a}$  and  $^{99m}\text{TcN-3b}$  identified by  $\gamma$ -counter (top) and autoradiography (bottom).
